# Supplementary material for: Construction of Cu–Ce/graphene catalysts via a one-step hydrothermal method and their excellent CO catalytic oxidation performance
Source: Royal Society of Chemistry journal article supplement (doi:10.1039/c7ra11676d), 2018-01-01
Supplement: c7ra11676d1.pdf [file c7ra11676d1.pdf]

# **Construction of Cu-Ce/graphene catalysts via one-step hydrothermal method and their excellent CO catalytic oxidation performance**

Yinshuang Zhao<sup>1,2</sup>, Fang Dong<sup>1</sup>, Weiliang Han<sup>1</sup>, Haijun Zhao<sup>1</sup>, Zhicheng Tang<sup>1\*</sup>

*(1. State Key Laboratory for Oxo Synthesis and Selective Oxidation, National Engineering Research Center for Fine Petrochemical Intermediates, Lanzhou Institute of Chemical Physics, Chinese Academy of Sciences, Lanzhou 730000, PR China*

*2. University of Chinese Academy of Sciences, Beijing 100039, PR China)*

\*Corresponding author. Tel.: +86-931-4968083, Fax: +86-931-8277088, E-mail address: tangzhicheng@licp.cas.cn (Z.Tang).

Table S1 Relative contents of O 1s in various chemical states.

| Samples                 | Chemical states | Binding energy (eV) | oxygen percent (%) |
|-------------------------|-----------------|---------------------|--------------------|
| 3Cu5Ce/graphene         | O <sub>α</sub>  | 529.1               | 2.91               |
|                         | O <sub>β</sub>  | 531.67              | 55.36              |
|                         | O <sub>γ</sub>  | 533.02              | 41.73              |
| 4Cu4Ce/graphene         | O <sub>α</sub>  | 529.47              | 17.97              |
|                         | O <sub>β</sub>  | 531.83              | 56.65              |
|                         | O <sub>γ</sub>  | 533.10              | 25.38              |
| 5Cu3Ce/graphene         | O <sub>α</sub>  | 529.55              | 28.69              |
|                         | O <sub>β</sub>  | 531.59              | 58.36              |
|                         | O <sub>γ</sub>  | 533.36              | 12.95              |
| Used<br>5Cu3Ce/graphene | O <sub>α</sub>  | 530.22              | 16.4               |
|                         | O <sub>β</sub>  | 531.64              | 53.0               |
|                         | O <sub>γ</sub>  | 533.54              | 30.6               |

Table S2 Results of H<sub>2</sub>-TPR analysis.

| Samples         | Temperature of peaks (°C) |         |          |          |
|-----------------|---------------------------|---------|----------|----------|
|                 | $\alpha$                  | $\beta$ | $\gamma$ | $\delta$ |
| 3Cu5Ce/graphene | 253                       | 379     | 533      | 630      |
| 4Cu4Ce/graphene | 230                       | 399     | 565      | 653      |
| 5Cu3Ce/graphene | 208                       | 414     | 574      | 671      |
| Ce/graphene     | -                         | -       | 576      | 639      |
| Cu/graphene     | 223                       | 515     | -        | 614      |

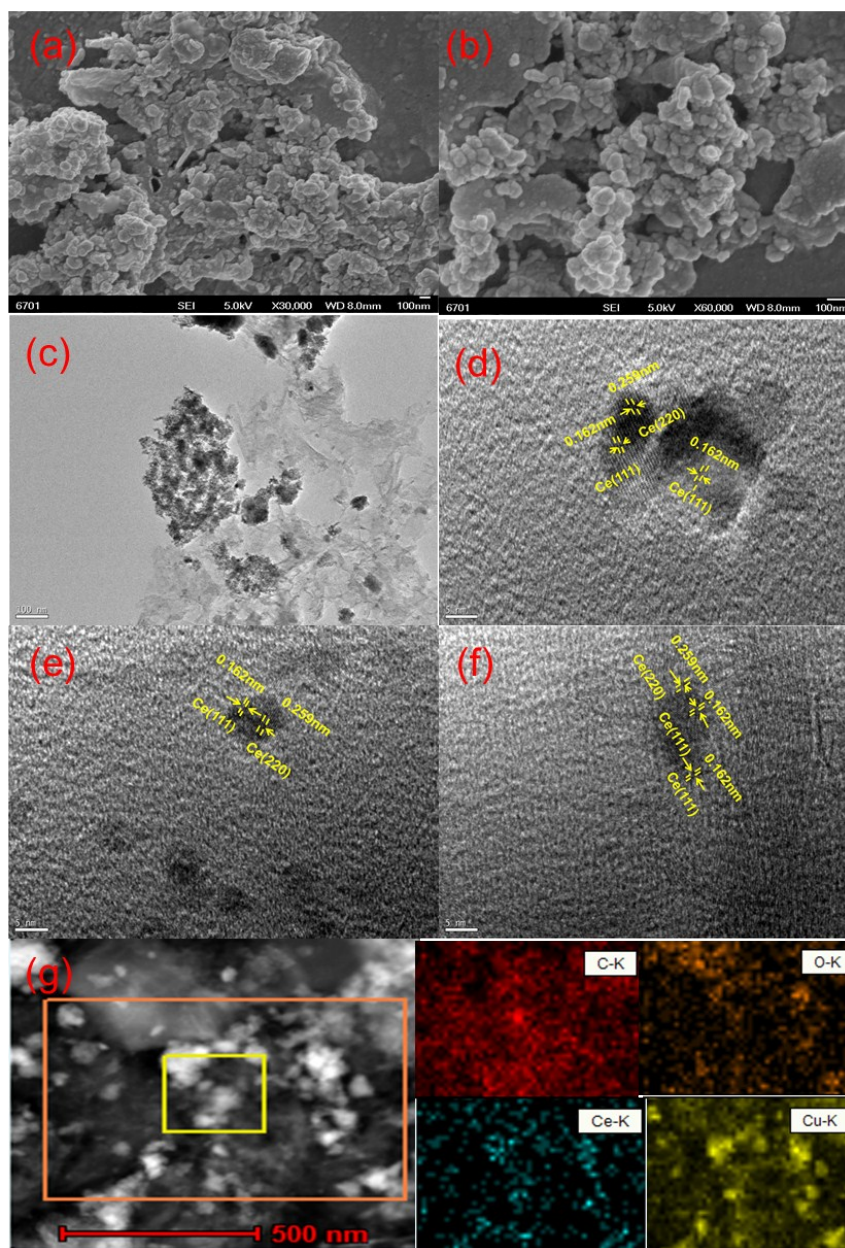

Fig. S1 SEM (a,b) and TEM (c) images of 5Cu<sub>3</sub>Ce/graphene ,HRTEM images of 3Cu<sub>5</sub>Ce/graphene (d), 4Cu<sub>4</sub>Ce/graphene (e) and 5Cu<sub>3</sub>Ce/graphene (f) catalysts, and elemental mapping of C, O, Ce, Cu for 5Cu<sub>3</sub>Ce/graphene catalyst(g).

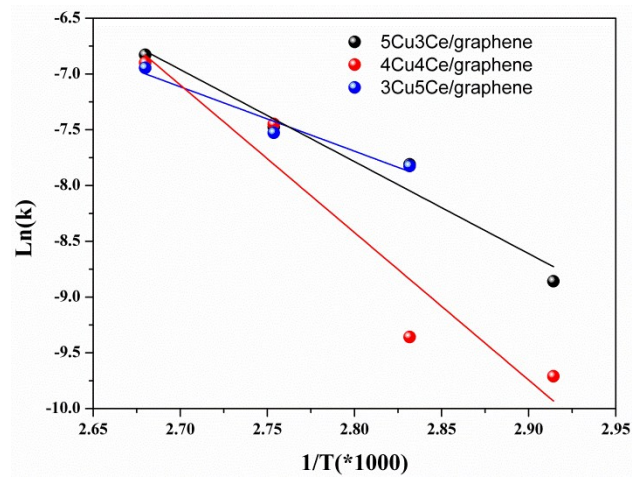

Fig.S2 Arrhenius plots of the 3Cu5Ce/graphene, 4Cu4Ce/graphene and 5Cu3Ce/graphene catalysts for CO oxidation.
